# Supplementary material for: Highly dispersed ultrafine shell-like nano-Pt with efficient hydrogen evolution via metal boron organic polymers
Source: Royal Society of Chemistry journal article supplement (doi:10.1039/d0ta02110e), 2020-01-01
Supplement: d0ta02110e1.pdf [file d0ta02110e1.pdf]

## Supporting information

### **High-dispersion Ultrafine Shell-like Nano-Pt with Efficient Hydrogen Evolution Evolved via Metal Boron Organic Polymers**

Xue Zhao,<sup>a</sup> Ziqiong Yang,<sup>a</sup> Wenjing Wang,<sup>b</sup> Yuxin Li,<sup>d</sup> Xiaohai Zhou<sup>\*a,c</sup> and Haibo Zhang<sup>\*a,c</sup>

**a** College of Chemistry and Molecular Sciences, Wuhan University, Wuhan 430072, P. R. China.

*E-mail:* haibo Zhang 1980@gmail.com; zxh7954@whu.edu.cn

**b** The State Key Laboratory of Refractories and Metallurgy, School of Chemistry and Chemical Engineering, Wuhan University of Science and Technology, Wuhan 430081, P. R. China

**c** National Demonstration Center for Experimental Chemistry, Wuhan University, Wuhan 430072, P. R. China

**d** Key Laboratory of Function Inorganic Material Chemistry (MOE), School of Chemistry and Material Science, Heilongjiang University, Harbin 150080, P. R. China

**e** Engineering Research Center of Organosilicon Compounds & Materials, Ministry of Education, Wuhan 430072, P. R. China

\*Corresponding Author

Prof. Dr. **Haibo Zhang**, *E-mail:* haibo Zhang 1980@gmail.com,

Prof. Dr. **Xiaohai Zhou**, *E-mail:* zxh7954@whu.edu.cn

**Dodecahydro-*closo*-dodecaborate dianion (*closo*-[B<sub>12</sub>H<sub>12</sub>]<sup>2-</sup>) has the properties of a reducing agent**

The principle of reduction of *closo*-[B<sub>12</sub>H<sub>12</sub>]<sup>2-</sup> is similar to that of NaBH<sub>4</sub>. Due to the strong polarization of B, each hydrogen atom carries 0.00823e in *closo*-[B<sub>12</sub>H<sub>12</sub>]<sup>2-</sup> (while the core cage structure composed of B is enriched with a large amount of negative charge).<sup>1,2</sup> However, compared to H<sup>-1</sup> in NaBH<sub>4</sub>, *closo*-[B<sub>12</sub>H<sub>12</sub>]<sup>2-</sup> is relatively less reductive and can only reduce some precious metal ions to the corresponding zero-valent state in a mild manner (such as Au<sup>3+</sup>, Pd<sup>2+</sup>, Pt<sup>4+</sup> and Ag<sup>+</sup>).<sup>3-7</sup>

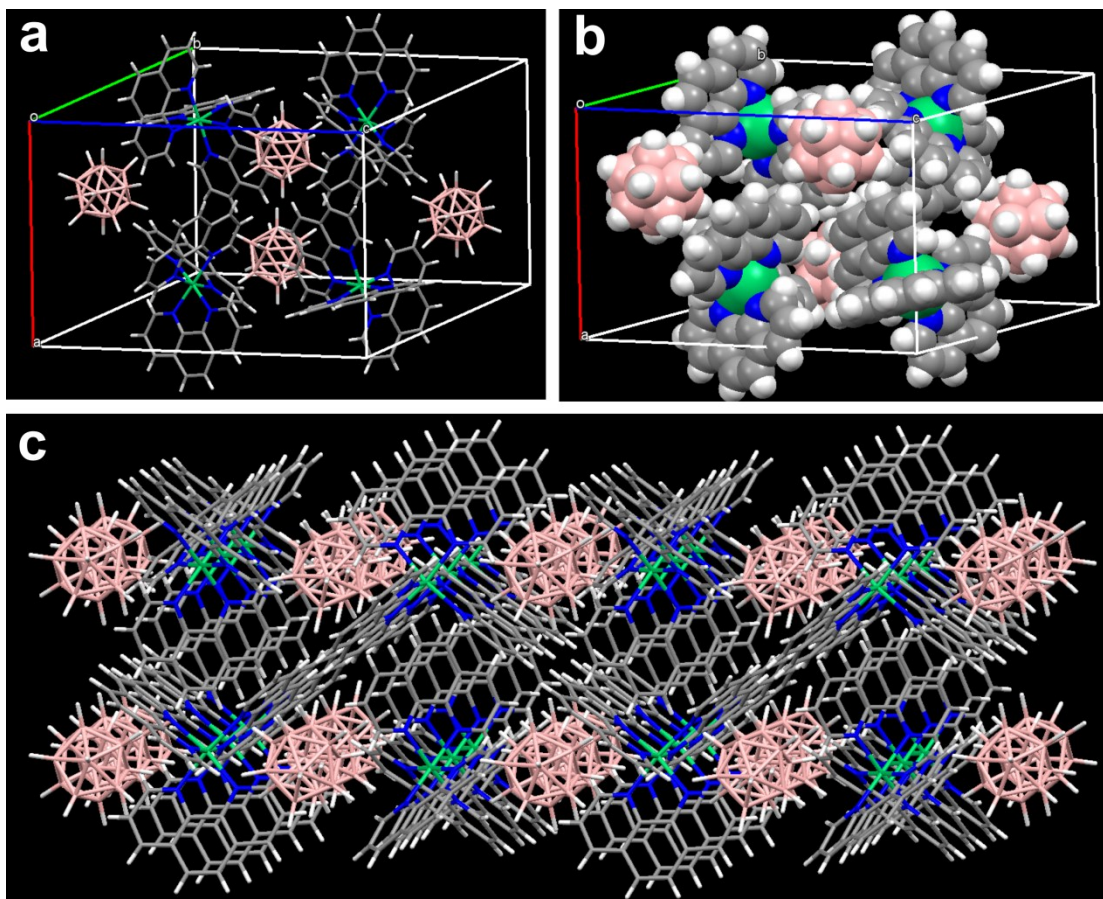

**Figure S1.** Crystal structure of M-BOPs (solvent molecules have been hidden for clarity). **a-b)** Unit cell views and **c)** wide view of M-BOPs crystal

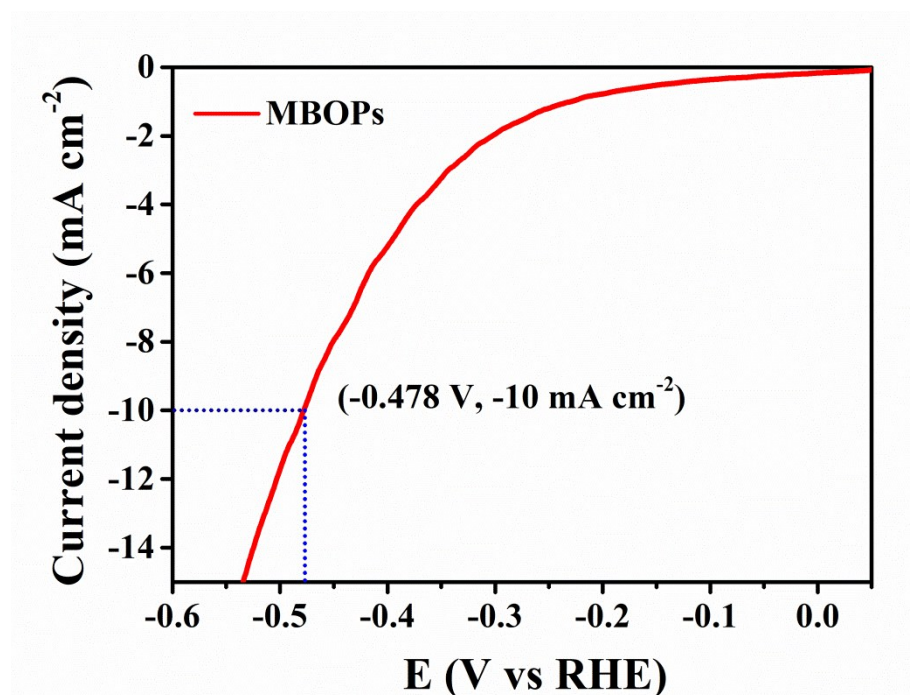

**Figure S2.** LSV curve obtained with MBOPs as catalyst

| <b>Table S1. Overpotentials of Pt/MBOPs with other recently reported Pt-based E-HER catalysts in 1M KOH.</b> |                    |                                        |                                                                        |
|--------------------------------------------------------------------------------------------------------------|--------------------|----------------------------------------|------------------------------------------------------------------------|
| <b>Catalyst</b>                                                                                              | <b>Electrolyte</b> | <b><math>\eta_{10}</math><br/>(mV)</b> | <b>Information Sources</b>                                             |
| Pt/MBOPs                                                                                                     | 1M KOH             | 22.8                                   | <b><i>This work</i></b>                                                |
| Pt/C                                                                                                         | 1M KOH             | 36.1                                   | <b><i>This work</i></b>                                                |
| Pt/OLC                                                                                                       | 1M KOH             | 38                                     | <i>Nature Energy</i> , 2019, 4, 512-518                                |
| PtNi-O/C                                                                                                     | 1M KOH             | 39.8                                   | <i>Journal of the American Chemical Society</i> , 2018, 140, 9046-9050 |
| PtNWs/SL-Ni(OH) <sub>2</sub>                                                                                 | 1M KOH             | 70                                     | <i>Nature Communications</i> , 2015, 6, 6430                           |
| NiOx/Pt <sub>3</sub> Ni                                                                                      | 1M KOH             | 40                                     | <i>Angewandte Chemie International Edition</i> , 2016, 55, 12859       |
| Pt <sub>3</sub> Ni <sub>2</sub> -NWs/SC                                                                      | 1M KOH             | 42                                     | <i>Nature Communications</i> , 2017, 8, 14580                          |
| Mo <sub>2</sub> C@NC@Pt                                                                                      | 1M KOH             | 47                                     | <i>ACS Applied Materials &amp; Interfaces</i> , 2019,11, 4047-4056     |
| Pt on WS <sub>2</sub>                                                                                        | 1M KOH             | 45                                     | <i>Advanced Materials</i> , 2018, 30, 1704779                          |
| Pt/NiO@Ni/NF                                                                                                 | 1M KOH             | 34                                     | <i>ACS Catalysis</i> , 2018, 18, 8866-8872                             |
| Pt/Ni(HCO <sub>3</sub> ) <sub>2</sub>                                                                        | 1M KOH             | 44                                     | <i>Angewandte Chemie International Edition</i> , 2019, 58, 5432-5437   |
| CDs/Pt PANI                                                                                                  | 1M KOH             | 56                                     | <i>Applied Catalysis B: Environmental</i> , 2019, 257, 117905          |
| A-CoPt-NC                                                                                                    | 1M KOH             | 32                                     | <i>Angewandte Chemie International Edition</i> , 2019, 58, 9404        |
| C Pt@ZIF-67                                                                                                  | 1M KOH             | 32                                     | <i>Journal of Materials Chemistry A</i> , 2018, 6, 1376-1381           |
| Pd/Cu-Pt                                                                                                     | 1M KOH             | 22.8                                   | <i>Angewandte Chemie International Edition</i> , 2017, 56, 16047       |
| PtCoFe@CN                                                                                                    | 1M KOH             | 45                                     | <i>ACS Applied Materials &amp; Interfaces</i> , 2017, 9, 3596-3601     |

| <b>Table S2.</b> TOF value of Pt/MBOPs with other recently reported Pt-based catalysts in hydrolysis hydrogen evolution of ammonia borane. |               |                                                                           |                                                                          |
|--------------------------------------------------------------------------------------------------------------------------------------------|---------------|---------------------------------------------------------------------------|--------------------------------------------------------------------------|
| <b>Catalyst</b>                                                                                                                            | <b>T (°C)</b> | <b>TOF<sub>molH<sub>2</sub> molPt<sup>-1</sup> min<sup>-1</sup></sub></b> | <b>Information Sources</b>                                               |
| Pt/MBOPs                                                                                                                                   | 25            | 1654.9                                                                    | <b><i>This work</i></b>                                                  |
| BOPs@Pt                                                                                                                                    | 25            | 131                                                                       | <i>ChemCatChem, 2019, 11, 2362-2369</i>                                  |
| SiO <sub>2</sub> @Pt@NGO                                                                                                                   | 25            | 324.6                                                                     | <i>Sustainable Energy Fuels, 2017, 1, 2128-2133</i>                      |
| Pt@MIL-101                                                                                                                                 | RT            | ~414                                                                      | <i>Journal of the American Chemical Society, 2012, 134, 13926-13929</i>  |
| Pt/CNT                                                                                                                                     | 30            | ~414                                                                      | <i>Journal of the American Chemical Society, 2014, 136, 16736-16739</i>  |
| Pt-CNTs-O-HT                                                                                                                               | 25            | ~580                                                                      | <i>ACS Catalysis, 2016, 6, 6892-69059</i>                                |
| Pt-CNT                                                                                                                                     | 30            | 567                                                                       | <i>Chemical Communication, 2014, 50, 2142-2144</i>                       |
| Pt/CeO <sub>2</sub>                                                                                                                        | 25            | 182                                                                       | <i>Chemical Communication, 2012, 48, 10207-10209</i>                     |
| Pt <sub>25</sub> Pd <sub>75</sub> NPs                                                                                                      | 25            | 69.76                                                                     | <i>Nanoscale, 2020,12, 638-647</i>                                       |
| PtAuNi                                                                                                                                     | 25            | 496                                                                       | <i>Nano Energy 2016, 23, 145-152</i>                                     |
| NiPt@MIL-101                                                                                                                               | 50            | 25.25                                                                     | <i>Inorganic Chemistry, 2017, 56, 19, 11938-11945</i>                    |
| PtNi@PVP                                                                                                                                   | RT            | 511                                                                       | <i>ACS Applied Materials &amp; Interfaces, 2014, 6, 12429-12435</i>      |
| Pt-Ni/NiO                                                                                                                                  | 30            | 1240.3                                                                    | <i>ACS Applied Materials &amp; Interfaces, 2017, 9, 3749-3756</i>        |
| Pt <sub>3</sub> Ni <sub>7</sub> O-NGO                                                                                                      | 25            | 709.6                                                                     | <i>Catalysis Science &amp; Technology, 2017, 7, 5135-5142</i>            |
| Pd-Co                                                                                                                                      | 35            | 118.25                                                                    | <i>International Journal of Hydrogen Energy, 2017, 42, 27055-27065</i>   |
| Pt-CoCu@SiO <sub>2</sub>                                                                                                                   | 30            | 272.8                                                                     | <i>ACS Sustainable Chemical &amp; Engineering, 2017, 5, 1675-1684</i>    |
| PtCo@PG                                                                                                                                    | 30            | 461.17                                                                    | <i>International Journal of Hydrogen Energy, 2017, 42, 26617-26625</i>   |
| Pt <sub>1</sub> Co <sub>1</sub> Ni <sub>2</sub> -BOFs                                                                                      | 25            | 1490                                                                      | <i>ACS Applied Materials &amp; Interfaces, 2019, 11, 26, 23445-23453</i> |

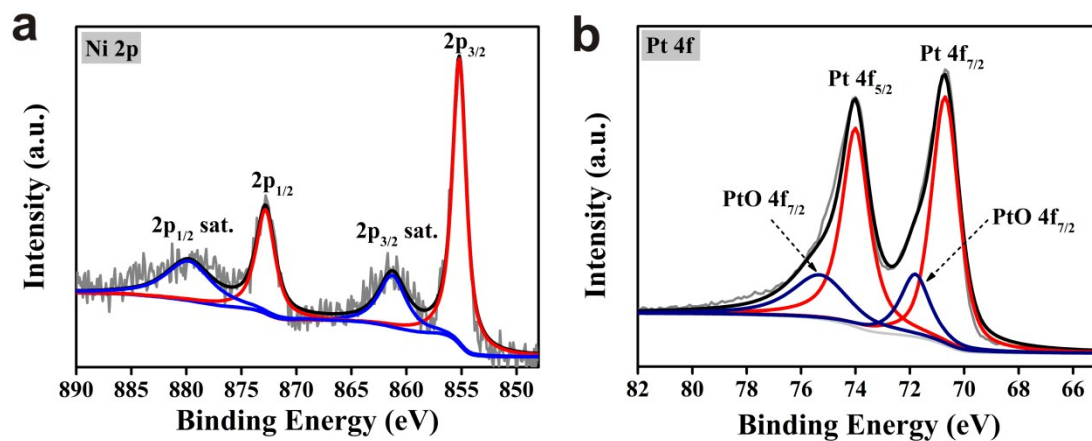

**Figure S3.** XPS spectrum of Pt/MBOPs after reused. **a)** Binding energy region of nickel and **b)** Binding energy region of platinum

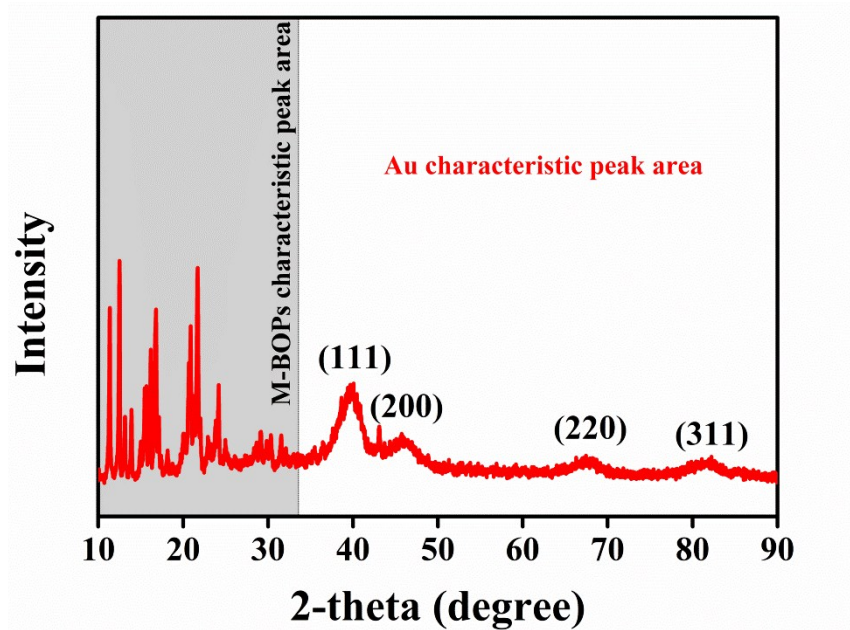

**Figure S4.** XRD spectrum of Pt/MBOPs after reused



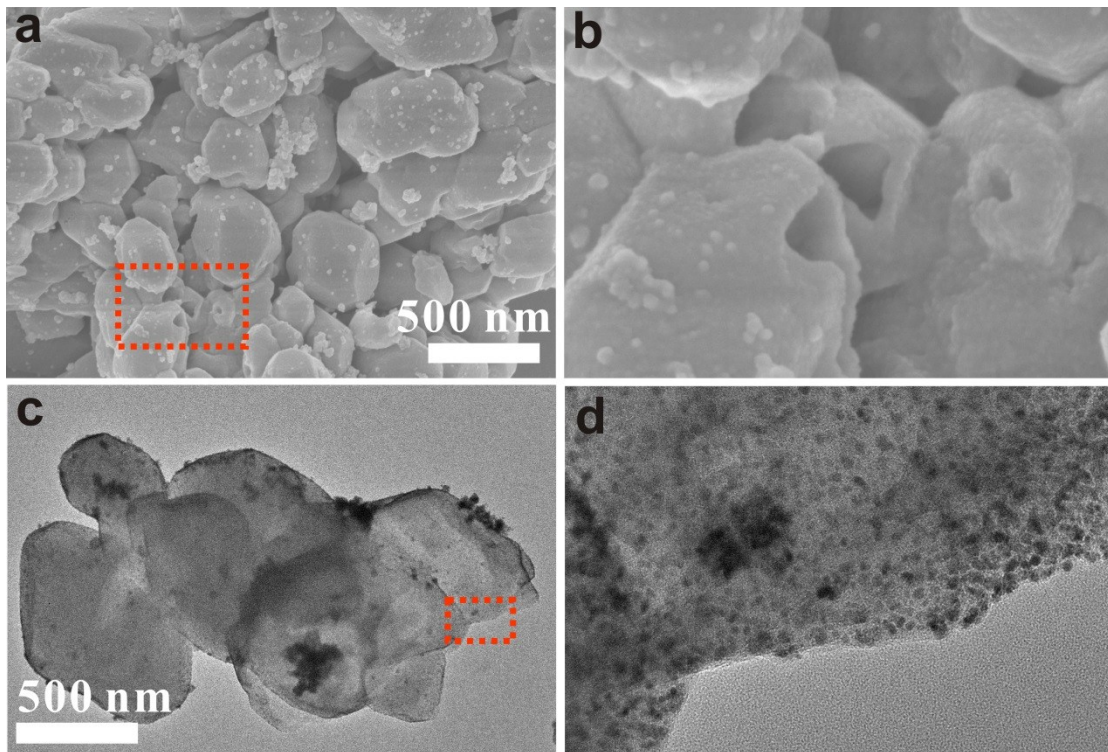

**Figure S5.** SEM images (a-b) and TEM images (c-d) of Pt/MBOPs after reused

## References

1. B. R. S. Hansen, M. Paskevicius, M. Jørgensen, and T. R. Jensen, *Chemistry of Materials*, 2017, 29, 3423-3430.
2. N. Jiao, Y. Zhang, L. Liu, J. M. Shreeve and S. Zhang, *Journal of Materials Chemistry A*, 2017, 5, 13341–13346
3. B. Qi, L. Du, F. Yao, S. Xu, X. Deng, M. Zheng, S. He, H. Zhang and X. Zhou, *ACS Applied Materials & Interfaces*, 2019, 11, 23445-23453.
4. X. Zhao, Y. Fu, C. Yao, S. Xu, Y. Shen, Q. Ding, W. Liu, H. Zhang and X. Zhou, *ChemCatChem*, 2019, 11, 2362-2369.
5. X. Zhao, C. Yao, H. Chen, Y. Fu, C. Xiang, S. He, X. Zhou and H. Zhang, *Journal of Materials Chemistry A*, 2019, 7, 20945-20951.
6. B. Qi, C. Wu, L. Xu, W. Wang, J. Cao, J. Liu, S. Zhang, D. Gabel, H. Zhang and X. Zhou, *Chemical Communications*, 2017, 53, 11790-11793.
7. B. Qi, X. Li, L. Sun, B. Chen, H. Chen, C. Wu, H. Zhang and X. Zhou, *Nanoscale*, 2018, 10, 19846-19853.
